# Supplementary material for: The Potential of Food Fortification as an Enabler of More Environmentally Sustainable, Nutritionally Adequate Diets
Source: Nutrients. 2023 May 25;15(11):2473. doi: 10.3390/nu15112473 (PMC10255058; doi:10.3390/nu15112473)
Supplement: Supplementary file 1 [file nutrients-15-02473-s001.zip › Supplementary Tables 1-4.xlsx]

## Sheet: Table S1
Table S1. Composition of the baseline diet of Dutch women and men 19-30 y and the optimized diets (average daily intake in grams) for three fortification scenarios: current diet (CUR); CUR with fortified meat, dairy, and fish alternatives (FORT-A); FORT-A with fortified bread and oils (FORT-B)
			WOMEN								MEN
Product name	Food group	Additional product added for this study?		Optimized for nutritional adequacy			Optimized for nutritional adequacy and 2030 GHGE target					Optimized for nutritional adequacy			Optimized for nutritional adequacy and 2030 GHGE target
			Baseline diet	CUR	FORT-A	FORT-B	CUR	FORT-A	FORT-B		Baseline diet	CUR	FORT-A	FORT-B	CUR	FORT-A	FORT-B
			(g/d)	(g/d)	(g/d)	(g/d)	(g/d)	(g/d)	(g/d)		(g/d)	(g/d)	(g/d)	(g/d)	(g/d)	(g/d)	(g/d)
Beer >7 vol% alcohol	Alcoholic Beverages		0	0.00114596	0.000149241	0.108686	9.50847e-07	3.39514e-05	1.10676e-05		0	0.000115144	0.000169463	0.0554191	5.41817e-06	2.80543e-06	5.96003e-06
Beer pilsner	Alcoholic Beverages		37.7143	37.4516	37.2775	37.8208	21.2344	29.2943	31.6865		425.143	424.735	424.798	425.172	341.958	384.503	391.811
Whisky	Alcoholic Beverages		0	1.17108e-05	2.70609e-06	0.000784506	9.51551e-08	5.90054e-06	1.81843e-06		0	3.64034e-06	2.16774e-06	0.000127926	7.59122e-07	4.75328e-07	1.1266e-06
Wine red	Alcoholic Beverages		0	0.00810523	0.00082908	0.00737504	1.89179e-07	1.18961e-05	3.76539e-06		0	1.20625e-05	1.07425e-05	0.000915705	1.3283e-06	8.33586e-07	1.96327e-06
Wine white dry	Alcoholic Beverages		0	0.0430196	0.0146289	0.0118009	1.61607e-07	1.03343e-05	3.33444e-06		0	1.82932e-05	1.83206e-05	0.00187929	1.13427e-06	6.97263e-07	1.66251e-06
Almond paste filled tarts average	Cakes		2.42857	1.04771e-05	4.91141e-06	0.663315	1.26782e-07	8.17985e-06	2.72579e-06		6.42857	0.0049798	0.447173	4.06732	1.03004e-06	6.6514e-07	1.64608e-06
Apple pie Dutch with shortbread with margarine	Cakes		10.2857	11.0011	11.0573	11.1287	6.79755e-07	7.50262e-05	3.38098e-05		5.57143	5.81322	5.97167	6.2375	2.96173e-06	1.59585e-06	3.64021e-06
Biscuit brown/wholemeal	Cakes		1.58571	0.753772	2.35871	3.02639	2.13903e-07	4.11197e-05	1.56115e-05		1.08571	0.0957138	0.491981	2.6683	1.72216e-06	1.43922e-06	4.4455e-06
Biscuit fruit	Cakes		4.92857	1.37357	2.75794	5.33963	2.68335e-07	3.13134e-05	2.2132e-05		3.74286	0.0014405	0.0452901	2.87878	1.96185e-06	1.39397e-06	3.72062e-06
Biscuit spiced Speculaas	Cakes		2.24286	5.63864e-06	2.40625e-06	0.0194132	1.65468e-07	1.00693e-05	3.13382e-06		1.61429	2.21472e-06	1.98695e-06	8.06493e-05	1.55867e-06	9.50728e-07	2.27876e-06
Biscuit sweet	Cakes		1.85714	8.69769e-06	3.07095e-06	0.0957514	1.8702e-07	1.86712e-05	8.69782e-06		0	1.59289e-06	1.26348e-06	3.57848e-05	1.60104e-06	1.16009e-06	3.08411e-06
Biscuits averaged	Cakes		2.5	1.06804e-05	6.84313e-06	0.81874	1.94405e-07	1.42645e-05	4.68663e-06		1.11429	3.46476e-06	3.22422e-06	0.000395468	1.70561e-06	1.12302e-06	2.80687e-06
Cake Dutch spiced	Cakes		10.8857	8.95151	9.93877	12.3856	8.01363e-07	1.23752	3.78366		6.85714	5.06022	5.31372	6.91881	9.30983e-06	8.48977e-06	2.07265e-05
Cake sponge Dutch	Cakes		3.98571	3.51384	2.74357	3.464	8.33121e-07	2.58865e-05	7.83733e-06		3	2.24024e-05	2.09349e-05	0.567625	3.80132e-06	1.61889e-06	3.67036e-06
Cake wo butter	Cakes		3.9	0.000142103	0.00610863	2.44738	9.9936e-07	3.19349e-05	8.70171e-06		3.08571	5.16731e-06	4.92191e-06	0.000200377	5.30443e-06	1.89971e-06	4.05684e-06
Chocolate chip cookie	Cakes		0	6.25857e-06	2.37577e-06	0.00032961	1.57689e-07	1.06965e-05	3.04317e-06		2	3.13189e-06	3.28065e-06	0.000610021	1.29357e-06	8.18925e-07	2.05941e-06
Pancake	Cakes		5.8	6.57142	4.58177	5.29218	2.97757	0.00169339	0.383999		2.7	0.000289243	0.00137694	0.650389	7.37653e-06	1.88133e-06	4.96142e-06
Waffle syrup average	Cakes		3.25	5.0599e-06	1.91793e-06	0.0267002	1.18896e-07	7.55362e-06	2.51964e-06		5.05	3.95341e-06	4.23548e-06	0.368364	1.0453e-06	6.9262e-07	1.69542e-06
Bread brown wheat	Cereals And Cereal Products		48.8	50.3283	50.3978	55.455	47.1369	48.6484	59.6582		83.55	83.8745	83.9188	87.5726	69.1537	72.961	99.541
Bread rye dark	Cereals And Cereal Products		0	9.67276	8.64592	10.6921	0.739936	0.347358	10.1296		0	9.53177	9.13274	10.1736	4.22092e-06	3.35405e-06	0.000223891
Bread white water based	Cereals And Cereal Products		17.45	14.2187	15.0354	21.3034	4.0909	12.4595	25.0146		21.4	15.5728	15.9775	21.3656	0.00176971	2.1708	30.2264
Bread wholemeal average	Cereals And Cereal Products		46.15	51.3247	50.8511	54.8662	64.9842	55.8363	63.7634		49.85	54.8896	54.6165	57.0845	103.49	72.4262	90.8521
Breakfast cereal Cornflakes	Cereals And Cereal Products		0	1.28653e-05	2.62837e-06	0.0838286	24	4.71516	4.77903		0	2.38165e-06	1.65411e-06	5.64465e-05	24	24	24
Bun currant/raisin	Cereals And Cereal Products		3.78571	5.13389	4.76984	6.11707	6.08554e-06	6.53326	5.598		4.21429	3.30981	3.49796	4.41469	5.70337e-06	5.0639e-06	1.76034e-05
Crispbakes Dutch	Cereals And Cereal Products		0	6.9474e-05	1.19014e-05	0.0656118	1.22783e-06	5.5644e-05	1.50943e-05		0	4.04402e-06	2.93403e-06	0.000600456	8.57867e-06	4.61039e-06	1.17461e-05
Crispbakes Dutch wholemeal	Cereals And Cereal Products		0	3.35107	3.83446	5.35807	8.4283	19.9998	19.9001		0	8.01082	7.72454	7.69605	20	20	20
Crispbread averaged	Cereals And Cereal Products		0	10.7528	9.91982	10.4628	19.2902	16.2237	13.3181		0	16.3369	15.6684	12.5878	10.1204	32.3632	28.9919
Crisps potato average	Cereals And Cereal Products		10.4857	1.0814	4.10038	9.32954	5.86638e-07	3.41248	13.631		11.6714	1.68073	2.81734	7.32806	8.50126e-07	8.89142e-07	2.76775e-06
Muesli crunchy plain/w fruit	Cereals And Cereal Products		2.6	4.06852	5.89701	6.66055	7.41389e-07	12.236	10.4741		1.51429	8.6861	8.76088	9.70357	1.62745e-05	29.5454	27.1217
Pasta white average boiled	Cereals And Cereal Products		30.9857	31.2513	31.2847	31.6961	1.0352e-06	11.7816	16.3474		39.4071	39.588	39.66	40.4851	3.14351e-06	2.4939e-06	9.3506e-06
Rice brown boiled	Cereals And Cereal Products		3.3	3.49107	3.9967	4.95116	6.51338e-07	3.80644e-05	1.52996e-05		3.06429	6.41897	5.95336	5.93445	5.96678e-06	2.0103e-06	4.7233e-06
Rice white boiled	Cereals And Cereal Products		19.8	17.7588	18.395	19.7158	3.32495e-07	9.37681e-05	0.406912		28.1286	26.4988	26.679	28.0103	2.08849e-06	1.38363e-06	3.83806e-06
Roll brown hard	Cereals And Cereal Products		6	5.95635	6.44183	12.1122	9.88905	6.31716	15.9234		6.71429	4.76058	4.97388	9.28974	26.6007	4.14937	23.3317
Roll white soft	Cereals And Cereal Products		19.7857	18.4065	18.4714	24.9926	20.7575	19.6988	29.4709		31.2143	27.8495	28.0909	32.8458	45.1006	24.6018	44.0969
Ketchup curry	Condiments And Sauces		2.14286	5.07436e-05	6.54691e-06	0.0850173	3.07886e-07	8.23316e-05	2.26001		5.2	3.29601e-06	2.63087e-06	9.52128e-05	1.89848e-06	1.85414e-06	6.10223e-06
Ketchup tomato	Condiments And Sauces		2.54286	8.01146e-05	9.38041e-06	0.548458	2.98034e-07	6.33155e-05	0.188196		4.97143	2.11935e-06	1.63143e-06	2.78023e-05	1.66692e-06	1.38778e-06	4.05101e-06
Mayonnaise	Condiments And Sauces		7.34286	4.12397e-06	9.31455e-07	1.47471	1.02894e-07	7.1253e-06	2.40907e-06		11.9429	3.63001e-06	3.80251e-06	3.03703	1.13478e-06	7.7365e-07	1.78333e-06
Peanut sauce jar prepared	Condiments And Sauces		6.54286	0.122854	1.5568	5.49957	8.69426	12.4504	12.2554		10.4571	1.45449	2.05906	4.48557	20	20	20
Sauce for chips 25% oil	Condiments And Sauces		3.17143	6.91512e-06	1.59937e-06	0.00550906	1.73445e-07	1.21816e-05	4.18271e-06		5.05714	1.51467e-06	1.22243e-06	2.89393e-05	1.67254e-06	1.14976e-06	2.67167e-06
Sauce tomato ready-made jar	Condiments And Sauces		8.71429	7.63512	7.98197	9.10625	7.61264e-07	3.34766	6.15227		10.5	6.38358	6.70392	6.8227	2.99465e-06	2.71832e-06	8.20885e-06
Buttermilk	Dairy Products		22.1429	23.1907	21.3727	21.9003	9.65146	9.74364	13.0083		12.5	11.4591	11.5081	11.891	5.14845e-06	1.58494e-06	4.13014e-06
Cheese 20+	Dairy Products		0	5.6108e-06	1.0888e-06	0.000162224	9.28739e-08	2.92385e-06	7.63959e-07		0	9.66376e-07	8.29468e-07	1.12016e-05	6.10246e-07	1.66213e-07	3.99916e-07
Cheese 30+ average	Dairy Products		2.34286	6.18494e-06	1.16444e-06	0.000302911	1.00368e-07	2.92867e-06	7.83032e-07		1.4	1.00874e-06	8.94881e-07	1.25014e-05	5.98272e-07	1.66148e-07	3.99401e-07
Cheese Edam 40+	Dairy Products		1.25714	3.51056e-06	8.17902e-07	0.00013239	6.94166e-08	2.63636e-06	7.32615e-07		1.11429	7.48851e-07	6.62857e-07	8.65672e-06	4.52927e-07	1.599e-07	3.85084e-07
Cheese Gouda 48+ average	Dairy Products		28.3714	7.85051	12.0817	20.8879	5.57694e-08	2.59967e-06	8.22048e-07		37.1714	18.4206	19.6861	24.3937	3.36748e-07	1.39599e-07	3.4432e-07
Cheese spread 48+	Dairy Products		1.73571	5.42156e-06	1.05303e-06	0.000192062	8.40811e-08	3.28594e-06	9.70304e-07		1.52143	8.25863e-07	7.18818e-07	8.86952e-06	4.98962e-07	2.07614e-07	4.98355e-07
Coffee creamer full fat	Dairy Products		0	0.000203685	2.80842e-06	0.000417277	35.7594	0.00125274	0.00561626		0	4.45604e-06	4.2085e-06	9.66564e-05	37.2759	1.66393e-06	4.38182e-06
Coffee creamer half fat	Dairy Products		4.99429	5.10986	2.0521	3.70353	21.4424	0.00021452	0.00358899		0	5.68156e-06	5.06946e-06	0.000133118	1.33112e-05	1.27232e-06	3.23511e-06
Custard chocolate full fat	Dairy Products		0	0.130879	0.000115783	0.00993405	1.95863e-07	1.07949e-05	3.51637e-06		0	1.69656e-05	1.88869e-05	0.00175076	1.21699e-06	6.42964e-07	1.56091e-06
Custard several flavors full fat	Dairy Products		9.21429	7.58934	7.19084	8.32683	6.32445e-07	3.11713e-05	1.70321e-05		8.78571	6.06158	6.32885	7.32952	2.23679e-06	1.07165e-06	2.61303e-06
Custard vanilla full fat	Dairy Products		10.7143	9.09905	8.51373	9.96292	4.93628e-07	3.82266e-05	3.14079e-05		13.2857	11.0544	11.2524	12.2402	2.33074e-06	1.1038e-06	2.81868e-06
Fromage frais half fat with fruit	Dairy Products		0	1.01754	1.24401e-05	0.00273259	1.31889e-07	6.33438e-06	2.10665e-06		0	1.26972e-05	1.45872e-05	0.00216336	7.42654e-07	4.11531e-07	1.00331e-06
Milk chocolate-flavored full fat	Dairy Products		9.28571	10.0634	8.60068	9.08943	4.15848e-07	2.75035e-05	1.5731e-05		10	9.22252	9.32855	9.87829	1.74386e-06	8.3157e-07	2.11021e-06
Milk chocolate-flavored semi-skimmed	Dairy Products		12.1429	15.2872	13.4919	13.3321	4.17506e-07	4.3058e-05	4.07335e-05		11.0714	13.0079	12.9357	12.69	1.75134e-06	8.56407e-07	2.18513e-06
Milk semi-skimmed	Dairy Products		166.429	167.024	165.121	165.948	140.589	147.669	152.894		268.929	267.588	267.682	268.239	85.2179	140.388	175.837
Milk skimmed	Dairy Products		14.6429	16.0347	13.8085	14.3818	2.78234e-06	0.000872088	2.55419		8.92857	7.77276	7.83082	8.26647	2.93214e-06	1.11029e-06	2.81448e-06
Milk whole	Dairy Products		8.21429	7.6415	6.18659	7.41438	9.88623e-07	4.32907e-05	3.15473e-05		16.0714	14.3988	14.5045	15.237	3.02832e-06	1.16828e-06	3.08567e-06
Yoghurt drink	Dairy Products		13.2143	13.0336	11.9359	12.7708	3.94484e-07	4.09049e-05	4.19865e-05		21.7857	19.9064	20.0727	20.8692	1.9512e-06	1.01934e-06	2.71938e-06
Yoghurt full fat	Dairy Products		11.1429	10.7426	9.29746	10.4558	6.62089e-07	3.47786e-05	2.21845e-05		0	1.71638e-05	1.84147e-05	0.000698564	2.11836e-06	8.11636e-07	1.95565e-06
Yoghurt full fat with fruit	Dairy Products		0	0.0348985	8.07696e-06	0.0024032	5.905e-07	1.69251e-05	5.52492e-06		0	9.27484e-06	8.43146e-06	0.000440708	2.49738e-06	9.44428e-07	2.29803e-06
Yoghurt half fat	Dairy Products		5.57143	6.03035	4.26312	5.03844	5.12181e-07	2.44221e-05	1.00706e-05		0	1.59881e-05	1.64931e-05	0.000609719	2.12127e-06	8.61985e-07	2.09613e-06
Yoghurt low fat	Dairy Products		32.3571	33.4936	31.4395	32.0913	1.82974	9.99374	15.3607		22.5	21.2138	21.2834	21.76	2.52316e-06	9.65228e-07	2.56166e-06
Yoghurt low fat with fruit	Dairy Products		9	9.9508	7.85928	8.6535	6.87168e-07	3.99354e-05	2.70244e-05		0	1.35592e-05	1.2247e-05	0.000673884	2.23397e-06	9.51609e-07	2.31284e-06
Eggs chicken boiled average	Eggs And Egg Products		12.2857	24.6695	18.7968	13.6669	50	8.91814	3.07554		16.2857	19.4347	18.4361	16.1824	25.5147	2.80786e-06	6.34822e-06
Butter product half fat	Fat		0	2.13992e-06	7.66168e-07	9.24206e-05	6.20216e-08	3.81037e-06	1.24203e-06		0	2.39156e-06	2.97486e-06	4.7838e-05	4.57882e-07	2.92137e-07	7.02571e-07
Butter salted	Fat		1.80714	1.00135e-06	3.59456e-07	4.78491e-05	3.33191e-08	2.05371e-06	6.75365e-07		1.57857	1.07342e-06	1.34375e-06	2.18793e-05	2.44445e-07	1.59838e-07	3.87091e-07
Butter unsalted	Fat		2.15714	1.03341e-06	3.91688e-07	5.27613e-05	3.32982e-08	2.05729e-06	6.77774e-07		2.3	2.12274e-06	3.59554e-06	0.000197311	2.45163e-07	1.59994e-07	3.87586e-07
Cooking fat liquid 97% fat <17 g sat	Fat		1.8	4.65704	5.56273	5.11361	1.11317e-05	9.67687	2.60802		3.47143	5.36272	5.68345	1.24794	15.9739	18.3489	4.99668e-05
Low fat margarine 40% fat <17 g sat	Fat		8.98571	29.1431	26.9159	16.3567	50	41.6549	25.8933		13.9143	32.7292	31.6068	20.1493	50	50	24.2247
Margarine 80% fat 17-24 g saturates	Fat		1.87571	5.99238	7.89073	5.61852	8.39946e-07	0.122211	2.78783e-05		3.91857	14.1373	13.9593	7.35873	3.43166e-06	2.07125e-06	3.74301e-06
Margarine liq 80% fat < 17g sat unsalted	Fat		0	10.288	9.4488	5.91623	4.80368e-07	0.000265826	1.49163e-05		0	13.0327	12.5279	5.76957	2.65803e-06	1.63755e-06	3.00424e-06
Margarine liq 80% fat <17 g saturates	Fat		0	11.6246	10.4655	5.32186	4.48805e-07	0.000497098	1.5118e-05		0	7.22914	7.03154	0.760608	2.57695e-06	1.66695e-06	3.04336e-06
Margarine product 60% fat <17 g sat	Fat		0	14.0254	13.1139	6.46664	26.9578	16.8273	6.45256		0	17.3962	16.5347	7.22574	2.14058	8.66426e-05	1.15722e-05
Oil olive	Fat		3.92857	2.21032e-06	6.20288e-07	0.0199932	4.34521e-08	2.94864e-06	1.06593e-06		3.48571	8.95121e-07	7.97128e-07	0.00128488	3.93783e-07	2.66021e-07	6.79083e-07
Oil soy	Fat		1.72857	1.55276e-06	2.96252e-07	0.00041934	1.38434e-07	9.56832e-06	6.01432e-06		3.47143	9.50333e-07	8.25485e-07	0.00850186	4.68916e-06	3.78491	17.362
Oil sunflower seed	Fat		1.74286	1.66318e-06	2.99298e-07	0.000757774	6.95963e-08	4.46627e-06	1.80345e-06		0	7.31672e-07	6.13642e-07	5.22015e-05	8.0673e-07	5.74778e-07	1.51726e-06
Cod boiled	Fish And Shellfish		2.05714	8.74113	7.53377	4.12592	1.13267e-07	5.65758e-06	1.93212e-06		0.685714	6.62406	4.65293	1.27936	6.03197e-07	2.82603e-07	6.59133e-07
Herring salted	Fish And Shellfish		0.75	22.895	17.8424	6.25323	32.1429	32.1428	18.1537		0.642857	8.06593	5.46595	2.82392e-05	32.1429	23.0004	7.21893e-06
Mackerel steamed	Fish And Shellfish		0.357143	5.52062	7.42851	3.95197	13.9641	13.5581	14.2857		0	10.2531	7.80626	1.42868	13.6455	14.2857	7.28179
Mussels boiled	Fish And Shellfish		0.342857	4.46767	1.649	0.000856842	1.25284e-07	4.21981e-06	1.31625e-06		0	2.69562e-06	1.57596e-06	1.84656e-05	6.35025e-07	2.61306e-07	5.96872e-07
Pangasius prep in microwave oven	Fish And Shellfish		0	2.93399e-05	5.79923e-06	0.00134471	6.49113e-08	3.8118e-06	1.33405e-06		0	3.80044e-06	2.37889e-06	3.40157e-05	4.12401e-07	2.53175e-07	6.05773e-07
Salmon farmed prep in microwave oven	Fish And Shellfish		2.91429	15.912	15.867	8.8147	2.93299e-07	0.000133793	0.0062523		2.57143	18.7678	16.851	8.88173	8.30335e-07	6.90125e-07	1.47555e-06
Salmon smoked	Fish And Shellfish		1.32857	6.34376	5.2566	2.48254	3.00497e-06	5.75084e-05	8.47809e-05		1.3	5.37175e-06	2.62936e-06	1.33597e-05	8.78528e-07	6.39756e-07	1.41503e-06
Shrimps Dutch peeled boiled	Fish And Shellfish		2.02857	0.000327033	3.47326e-06	0.00289653	3.18167e-08	1.62721e-06	5.30913e-07		1.44286	1.15903e-06	8.39372e-07	1.00419e-05	1.9708e-07	1.07912e-07	2.57881e-07
Tuna in oil tinned	Fish And Shellfish		0.728571	12.2144	8.87503	3.16668	7.90152e-08	2.10522e-06	6.49877e-07		2.8	10.953	6.57802	0.934923	3.08702e-07	1.2515e-07	2.8559e-07
White fish fillet in batter deep-fried	Fish And Shellfish		1.03571	0.989192	0.524308	0.339793	1.53615e-07	4.84518e-06	1.52865e-06		6.42143	4.58768	2.78559	1.60412	7.28216e-07	2.64974e-07	6.17477e-07
Apple sauce tinned	Fruits, Nuts And Seeds		6.15	7.18138	7.12654	7.36416	2.49966e-07	1.87311e-05	8.26464e-06		3.51429	5.48517	5.43908	5.41268	1.54593e-06	9.62944e-07	2.33837e-06
Apple with skin average	Fruits, Nuts And Seeds		27.9429	29.4232	29.4527	29.7953	16.8856	26.6413	28.1662		21.9429	25.43	25.2817	24.7341	3.4446e-05	10.9701	12.1915
Banana	Fruits, Nuts And Seeds		22.8571	24.0526	23.9717	24.4616	63.7888	33.5268	33.3416		21.4286	24.3244	24.0684	23.904	51.5833	33.8541	27.0009
Cashew nuts unsalted	Fruits, Nuts And Seeds		1.74286	1.65311	2.73378	1.1381	23.212	8.76653	4.12479		0	0.000237186	4.02918e-05	2.29273	15.8367	2.17667e-06	5.44875e-06
Grapes with skin average	Fruits, Nuts And Seeds		5.42857	6.24211	6.40978	6.86596	7.19382e-07	1.52522	4.69498		0	2.48131	2.40872	2.26098	3.60059e-06	2.72609e-06	7.05544e-06
Kiwi fruit	Fruits, Nuts And Seeds		6.64286	8.91866	8.7441	8.97207	6.67641	14.2108	13.6332		5.03571	9.10447	8.8896	8.2309	1.35989e-05	9.1966	11.8539
Mandarins	Fruits, Nuts And Seeds		10.8429	11.5443	11.3508	11.8027	2.22312	10.6116	11.7128		5.89286	7.53693	7.48226	7.4094	1.03213e-05	1.18757e-05	0.000126156
Melon netted	Fruits, Nuts And Seeds		2.85714	5.04783	4.15151	3.17553	2.56737e-06	2.28718	3.61314		2.14286	2.6227	2.61941	2.67133	5.46501e-06	3.78823e-06	1.08e-05
Nuts mixed unsalted	Fruits, Nuts And Seeds		0	2.0839e-05	1.01487e-05	1.81727	1.03377e-06	1.0551	2.56516		0	2.56864	2.02702	5.47723	7.23754e-06	2.16284e-06	6.10977e-06
Olives tinned/glass	Fruits, Nuts And Seeds		0	1.37331e-05	2.48345e-06	0.000512465	1.70242e-07	1.11422e-05	3.30663e-06		0	5.57924e-07	4.33352e-07	4.906e-06	1.10341e-06	6.92343e-07	1.67716e-06
Orange	Fruits, Nuts And Seeds		9.28571	11.0877	10.8868	11.4426	9.40373e-05	10.2438	11.0242		5.35714	9.44307	9.25609	8.56245	9.12383e-06	1.44112e-05	0.000394905
Peanut butter	Fruits, Nuts And Seeds		3.23571	2.03848e-05	2.62891e-05	6.13706	4.55309e-07	1.1616	4.86573		7.8	8.99543	9.27808	12.3287	1.101e-05	5.96727	2.51131
Peanuts unsalted	Fruits, Nuts And Seeds		0	1.34446e-05	7.45758e-06	2.91813	32.8121	29.634	25.3514		2.4	6.23855	6.00129	8.81805	40	40	40
Pear with skin	Fruits, Nuts And Seeds		3.03571	4.95606	4.82626	5.14857	1.42074e-06	1.79299	3.55028		1.78571	5.88606	5.69953	4.95863	9.51884e-06	7.87895e-06	2.02534e-05
Pineapple	Fruits, Nuts And Seeds		3.71429	5.1114	5.02645	5.22302	9.90549e-07	0.000338168	0.564471		1.57143	4.64937	4.5222	4.14099	4.54188e-06	3.67249e-06	1.07304e-05
Strawberries	Fruits, Nuts And Seeds		7.32143	9.50479	8.96032	8.8266	5.80529e-08	4.02579e-06	1.36945e-06		2.32143	4.43599	4.33979	3.97585	3.67227e-07	2.35034e-07	5.81667e-07
Walnuts unsalted	Fruits, Nuts And Seeds		0	6.13389e-06	9.06325e-07	0.599349	2.27107e-05	4.41484	7.98052		0	3.68525e-05	3.29578e-05	4.23539	12.759	7.57971	10.1435
Beans brown tinned	Legumes		3.68571	13.7224	12.7459	11.6563	6.05886e-07	1.00519	2.00209		3.25714	17.4925	16.7371	13.075	2.63699e-06	1.87407e-06	5.15636e-06
Peas chick boiled	Legumes		0.514286	9.93212	9.04683	7.59191	8.43254	9.19248	5.77986		0	13.7272	13.0081	10.1771	1.45695e-05	9.53638e-06	2.94792e-05
Peas marrowfat legumes boiled	Legumes		0	11.995	11.0253	8.82565	39.4788	38.0894	30.8571		0	19.7377	18.5368	14.482	120	103.77	87.2041
Bacon rashers streaky	Meat And Meat Products		0	4.37141e-06	9.05608e-07	0.000124558	5.69541e-08	3.72746e-06	1.20001e-06		0	7.14064e-07	5.81686e-07	7.37779e-06	3.71854e-07	2.31635e-07	5.56308e-07
Beef frying steak prepared	Meat And Meat Products		0	5.3083	1.96751	0.00425183	1.29427e-08	7.61454e-07	2.44987e-07		0	1.08722e-05	6.46915e-06	0.00027762	8.13613e-08	4.9943e-08	1.20274e-07
Beef rump steak prepared	Meat And Meat Products		5.03571	9.79386	6.90181	4.15022	1.31295e-08	7.74703e-07	2.51255e-07		3.10714	0.666427	0.339104	1.61376	8.13928e-08	5.01257e-08	1.20777e-07
Beef smoke-dried	Meat And Meat Products		0	2.37026e-05	1.89422e-06	0.00014176	1.47579e-08	8.52779e-07	2.70694e-07		0	4.90212e-07	3.9255e-07	4.74869e-06	9.16938e-08	5.67268e-08	1.36032e-07
Beef steak tartare spiced	Meat And Meat Products		3.81429	0.000755395	0.00033414	0.865295	2.31242e-08	1.42186e-06	4.51809e-07		4.24286	1.56796e-06	1.23489e-06	1.99517e-05	1.48937e-07	9.25092e-08	2.2153e-07
Chicken fillet prepared	Meat And Meat Products		24.75	22.8867	22.802	23.6817	3.92871e-07	1.12065e-05	5.5944e-06		26.3571	24.1837	23.6855	24.9991	6.6238e-07	3.70946e-07	8.50371e-07
Chicken with skin prepared	Meat And Meat Products		6.32143	2.50921	1.87556	3.88593	6.29188e-08	3.71791e-06	1.17681e-06		6.21429	0.00612752	0.411989	3.31694	3.59297e-07	2.29503e-07	5.40522e-07
Ham lean boiled	Meat And Meat Products		3.75	5.98021e-05	1.3233e-05	0.984741	5.79227e-08	5.50095e-06	2.30911e-06		6.75	7.17273e-06	6.32976e-06	0.000250693	3.95463e-07	2.60123e-07	6.71407e-07
Ham shoulder medium fat boiled	Meat And Meat Products		6.23571	0.0151031	0.00201161	3.06389	5.53859e-08	4.41994e-06	1.6289e-06		12.3214	2.64451e-05	5.35616e-05	0.54779	3.67977e-07	2.36583e-07	5.95466e-07
Liver pate	Meat And Meat Products		0	0.737518	3.0737e-06	0.000183264	4.91314e-07	7.67405e-06	2.86759e-06		0	8.94517e-07	7.55422e-07	9.82072e-06	1.33961e-06	6.43434e-07	1.53237e-06
Liver pate sausage	Meat And Meat Products		0	6.79803	3.81626e-05	0.000175268	5.46981	8.71116e-06	0.403847		0	1.02592e-06	8.81392e-07	1.04772e-05	2.73417e-06	2.23847e-06	3.57576
Minced beef shallow fried	Meat And Meat Products		10.6071	11.2463	9.84943	8.4772	1.35893e-08	8.34385e-07	2.70093e-07		11.6786	5.87279	6.03308	8.05372	8.63156e-08	5.35842e-08	1.29314e-07
Minced beef/pork shallow fried	Meat And Meat Products		12.5357	11.5389	10.8927	11.3786	2.43763e-08	1.6754e-06	5.8802e-07		27.5357	25.2962	25.1121	26.3019	1.5191e-07	9.62841e-08	2.38282e-07
Pork shoulder chop prepared	Meat And Meat Products		3.32143	2.91925	1.18493	1.90955	5.51163e-08	3.86664e-06	1.44587e-06		5.35714	5.60841	4.93321	6.46439	3.20457e-07	1.92537e-07	4.78034e-07
Pork tenderloin prepared	Meat And Meat Products		1.82143	3.23542	1.65875	2.3208	7.52504e-08	8.24123e-06	5.04947e-06		0	6.07776	5.1718	5.37017	4.31052e-07	2.80718e-07	7.53389e-07
Salami	Meat And Meat Products		2.95714	5.03915e-06	1.25386e-06	0.00021841	2.98745e-08	1.95443e-06	6.19655e-07		6.96429	9.69769e-07	8.48189e-07	1.43707e-05	1.98011e-07	1.27203e-07	3.06808e-07
Salami sausage saveloy	Meat And Meat Products		2.20714	4.55461e-06	1.23133e-06	0.000213877	3.20728e-08	1.99389e-06	6.27103e-07		5.91429	9.45732e-07	7.92677e-07	1.1737e-05	2.10909e-07	1.30339e-07	3.1233e-07
Sandwich meat chicken	Meat And Meat Products		2.95714	7.06327e-05	9.64698e-06	0.0526595	1.72137e-07	5.87977e-06	1.77981e-06		7.75714	3.2346e-06	2.4189e-06	5.46758e-05	6.77953e-07	3.57112e-07	8.01325e-07
Sausage Dutch Frikandel deep-fried	Meat And Meat Products		12.1143	5.15291	6.25991	8.02715	3.89445e-07	2.47115e-05	5.51592e-06		16.9143	1.1168	1.88569	4.49269	1.57755e-06	7.32915e-07	1.60055e-06
Sausage cooked	Meat And Meat Products		0	4.26743e-06	1.042e-06	0.000120573	2.82262e-08	1.83049e-06	5.77072e-07		0	8.37279e-07	7.12905e-07	9.80827e-06	1.92963e-07	1.21262e-07	2.90714e-07
Sausage luncheon meat	Meat And Meat Products		1.88571	6.74473e-06	1.74809e-06	0.000292793	9.5097e-08	7.0765e-06	2.06553e-06		5.80714	1.43204e-06	1.21288e-06	2.11986e-05	6.67729e-07	4.33049e-07	1.02058e-06
Sausage pork Braadworst prepared	Meat And Meat Products		3	8.6932e-05	2.06149e-05	0.322096	3.47594e-08	2.2617e-06	7.65565e-07		4.28571	5.75726e-06	5.12539e-06	0.000124452	2.14533e-07	1.33596e-07	3.26598e-07
Sausage smoked cooked average	Meat And Meat Products		3.42857	7.48238e-06	2.44039e-06	0.00250223	1.86677e-08	1.18059e-06	3.81109e-07		5	1.99446e-06	1.72001e-06	3.40335e-05	1.26167e-07	7.82431e-08	1.89606e-07
Burger vegetarian unprepared	Meat, dairy, fish alternative	yes	0	2.03099	4.01878	1.95409	1.06148e-07	7.6871e-06	2.09387e-06		0	1.88832e-05	4.34136e-05	0.000436981	6.35721e-07	4.7307e-07	1.07325e-06
Drink soya Fresh Light	Meat, dairy, fish alternative		2.85714	10.5261	13.0454	7.38487	46.5948	31.8641	14.0917		1.78571	6.18228	11.9103	6.28186	112.622	48.4461	16.3895
Drink soya natural	Meat, dairy, fish alternative	yes	0	0.0857298	6.23794	2.74028	5.58343e-07	16.8977	4.88266		0	0.0510164	6.02798	2.56271	5.09409e-06	14.8603	0.00013273
Drink soya several flavors	Meat, dairy, fish alternative		3.21429	9.61011	12.3689	7.14225	47.5596	35.294	16.6151		0	2.44669	8.31737	3.35201	120.022	59.899	24.9326
Hamburger vegetarian unprep	Meat, dairy, fish alternative		0.428571	0.767875	2.93514	0.890727	4.10737e-07	15.7185	11.2594		0	2.70498e-06	2.1868e-06	2.88592e-05	1.37492e-06	2.68924e-06	6.72961e-06
Mincemeat vegetarian unprepared	Meat, dairy, fish alternative		0.571429	7.58988	15.7498	5.46786	1.1923e-07	0.429416	1.4882e-05		0.285714	3.48476	4.12214	1.87217	5.99514e-07	6.1081e-07	1.44423e-06
Quorn minced unprepared	Meat, dairy, fish alternative	yes	0	5.19503	8.46383	3.18359	3.47388e-07	1.02678e-05	2.65916e-06		0	4.18555	3.13327	0.837287	1.32586e-06	5.33598e-07	1.15493e-06
Sausage luncheon meat vegetarian	Meat, dairy, fish alternative	yes	0	1.18203e-05	5.46959e-06	0.000425671	8.2371e-08	8.32501e-06	2.47969e-06		0	9.18397e-07	7.54346e-07	1.10006e-05	5.21123e-07	4.23847e-07	9.9405e-07
Tuna alternative	Meat, dairy, fish alternative	yes	0	3.27503	9.64087	4.7269	2.63483e-07	14.1564	7.9614		0	4.28127	10.179	6.54993	1.64955e-06	4.01327e-06	6.64469e-06
Vegan salmon balls	Meat, dairy, fish alternative	yes	0	0.00990221	4.69099	4.21876	2.55321e-07	12.0655	7.43569		0	0.719663	6.86377	3.2674	2.4677e-06	9.44541	2.00052
Vegetarian schnitzel unprepared	Meat, dairy, fish alternative	yes	0	6.5367	6.15655	3.04481	1.65126e-06	6.52101e-06	1.38292e-06		0	1.39793	1.68614	0.759485	1.52361e-06	3.08021e-07	7.12965e-07
Croquette meat ragout deep-fried	Miscellaneous		7.52143	4.53503	6.23532	6.53603	6.20957e-08	4.11649e-06	1.29505e-06		13.8357	7.71694	8.13269	8.9965	4.18026e-07	2.57416e-07	6.20899e-07
Snack sausage roll puff pastry	Miscellaneous		2.1	7.65566e-06	2.34696e-06	0.00145348	3.2572e-07	1.76412e-05	6.92813e-06		6.4	6.91389e-06	9.16931e-06	0.00645947	1.70964e-06	1.06319e-06	2.75289e-06
Cappuccino freshly made	Non Alcoholic Beverages		0	0.608621	0.286193	0.220484	3.07519e-07	2.03163e-05	7.39641e-06		0	0.376842	0.374765	0.355371	2.15678e-06	1.21306e-06	2.89922e-06
Coffee prepared	Non Alcoholic Beverages		246.607	247.137	246.921	246.613	240.853	248.181	248.392		397.321	397.374	397.372	397.377	388.937	397.087	395.331
Cola light soft drink with caffeine	Non Alcoholic Beverages		91.5	91.4648	91.4691	91.4835	66.6555	81.5744	84.1433		120	119.91	119.916	119.923	33.4308	73.273	83.1046
Ice tea	Non Alcoholic Beverages		34.7143	33.8721	34.0739	34.4704	4.8163	23.119	26.1813		58.0714	57.0354	57.1237	57.5401	1.28632e-05	8.10483	18.6199
Juice apple	Non Alcoholic Beverages		0	0.000435197	0.000196487	0.0228006	7.34955e-07	5.45313e-05	2.47852e-05		0	3.54277e-05	4.24835e-05	0.00491309	6.12314e-06	3.41822e-06	7.65273e-06
Juice drink	Non Alcoholic Beverages		42.4286	41.3911	41.6555	42.1523	17.486	33.189	35.7267		70.9286	69.8311	69.9331	70.4864	0.000410571	34.1007	41.2794
Juice drink light	Non Alcoholic Beverages		0	0.0375653	0.0243343	0.0863575	4.36813e-06	0.00250093	0.00180484		0	0.00711168	0.0090176	0.0434563	16.0521	1.34579	0.000610413
Juice orange freshly squeezed	Non Alcoholic Beverages		0	0.0100602	0.00921847	0.328501	2.98515e-07	2.99885e-05	1.30832e-05		0	0.135252	0.162898	0.469917	2.08297e-06	1.52234e-06	4.09801e-06
Juice orange pasteurized	Non Alcoholic Beverages		43.0714	42.9233	42.8935	43.3629	0.804277	33.0506	37.0033		48	48.1243	48.1555	48.4553	3.07895e-06	4.9898e-06	0.000333368
Mineral water average	Non Alcoholic Beverages		58.0714	58.0656	58.0663	58.0687	43.7958	51.5328	53.167		35.5714	35.5565	35.5574	35.5585	1.70802	6.98882	11.6611
Soft drink cola with caffeine	Non Alcoholic Beverages		111.214	110.243	110.491	110.957	83.4114	99.6204	102.636		235.286	234.266	234.361	234.881	146.827	187.119	196.984
Soft drink light without caffeine	Non Alcoholic Beverages		0	0.343987	0.258883	0.0903137	5.7115e-07	3.57107e-05	1.15051e-05		0	0.00929784	0.0112442	0.0402215	5.26283e-06	2.77109e-06	6.00689e-06
Soft drink wo caffeine	Non Alcoholic Beverages		0	0.000318908	0.000134095	0.0264041	5.04278e-07	2.96639e-05	9.54672e-06		39.6429	38.5764	38.6734	39.1845	1.03236e-05	2.45998e-05	1.33228
Tea herbal instant sw prepared	Non Alcoholic Beverages		0	0.00390753	0.00234333	0.0676063	1.8428e-07	1.09552e-05	3.53166e-06		0	0.000574052	0.000882463	0.0343746	1.33866e-06	7.89968e-07	1.8453e-06
Tea prepared	Non Alcoholic Beverages		566.143	566.131	566.133	566.158	562.947	563.472	564.077		194.786	194.756	194.758	194.76	203.854	185.514	184.494
Water average	Non Alcoholic Beverages		911.143	911.131	911.133	911.137	911.991	911.244	911.143		596.571	596.541	596.543	596.546	636.843	604.126	598.591
Potatoes wo skins boiled average	Potatoes And Other Tubers		79.4286	80.6153	80.7009	80.8545	83.3886	87.05	87.5661		122.5	124.796	124.738	124.704	50.3487	115.807	118.128
Soup clear w meat vegetables and noodles	Soups, Bouillon		5.71429	5.30696	5.04319	5.4424	4.32399e-07	2.20843e-05	9.40212e-06		13.2143	10.0941	10.1946	10.396	2.00884e-06	1.25547e-06	3.16085e-06
Soup clear with meat and vegetables	Soups, Bouillon		21.4286	21.1807	20.8784	21.2044	1.03145e-07	7.52381e-06	3.36774e-06		30.7143	27.7161	27.8475	27.9923	5.75494e-07	3.68601e-07	9.36465e-07
Soup main course w legumes and meat	Soups, Bouillon		2.85714	6.22446	5.66012	4.8969	1.91037e-07	1.57735e-05	7.12158e-06		0	2.13692	2.00004	1.22709	1.0364e-06	6.78663e-07	1.74265e-06
Soup vegetable based dried packet prep	Soups, Bouillon		13.9286	12.3147	12.5596	13.1689	3.54709e-07	4.48926e-05	7.12677e-05		21.4286	16.7559	17.0502	17.3287	2.03282e-06	1.40371e-06	3.77526e-06
Stock from cube prepared	Soups, Bouillon		8.57143	5.77701	6.1808	7.31314	1.51653e-06	0.00358293	1.30852		5.35714	3.90273e-05	0.000116583	0.018339	9.12484e-06	5.03962e-06	1.14215e-05
Chocolate confetti averaged	Sugar And Confectionery		0	5.98723	6.16754	1.3139	6.61188e-07	13.0958	8.14585		0	1.37094	1.8547	4.1191	2.43703e-06	4.53482e-06	2.09114e-05
Chocolate milk	Sugar And Confectionery		1.68571	6.79321e-06	2.29346e-06	0.000385538	1.16354e-07	6.25112e-06	1.9188e-06		1.83571	5.929e-06	9.39246e-06	0.986846	6.89802e-07	3.81117e-07	9.52826e-07
Chocolate plain	Sugar And Confectionery		0.678571	7.68792e-06	2.10903e-05	1.69152	1.66674e-07	1.46747e-05	4.35735e-06		1.12143	5.87346	6.27425	8.21501	1.25723e-06	8.86362e-07	2.26287e-06
Chocolates filled/Belgian chocolate	Sugar And Confectionery		3.57857	5.90437e-06	2.9545e-06	0.938619	1.94228e-07	1.10429e-05	3.33225e-06		0.814286	6.89259e-06	1.06542e-05	0.868744	1.5064e-06	8.23746e-07	1.99615e-06
Fruit drink concentrate	Sugar And Confectionery		0	3.39321e-05	1.08482e-05	0.00970959	2.09059e-07	1.38157e-05	4.28601e-06		0	5.91572e-06	4.51482e-06	0.00101988	1.78004e-06	1.34266e-06	3.52547e-06
Fruit drink concentrate undiluted	Sugar And Confectionery		0	1.32042e-05	3.01674e-06	0.000846349	2.59991e-07	1.75502e-05	5.6119e-06		0	2.60755e-06	2.01138e-06	0.000102762	2.62712e-06	1.79437e-06	4.12283e-06
Honey	Sugar And Confectionery		2.12143	3.6962e-05	1.33199e-05	0.183051	4.56361e-07	2.61656e-05	7.20535e-06		0.857143	2.06786e-06	1.61399e-06	0.000113154	5.07292e-06	3.45799e-06	7.38335e-06
Ice cream dairy cream based	Sugar And Confectionery		11.7143	4.94724	6.30738	9.58993	1.23422e-07	8.13098e-06	3.17599e-06		8.14286	3.80764	4.32885	6.40801	7.51889e-07	4.25547e-07	1.0545e-06
Ice lolly/ Sorbet	Sugar And Confectionery		0	0.000109806	3.34345e-05	0.0198191	3.54215e-07	2.19426e-05	7.06222e-06		0	1.53351e-05	1.46331e-05	0.00351181	3.08313e-06	1.83704e-06	4.19435e-06
Jam	Sugar And Confectionery		3.75	0.162241	1.2019	3.22699	2.11015e-07	1.51521e-05	5.12154e-06		5.87143	2.07107	2.50515	4.98809	1.76157e-06	1.19794e-06	2.90667e-06
Jam without sugar	Sugar And Confectionery		0	0.00136484	0.0240539	0.952802	2.35417e-07	1.76791e-05	5.96927e-06		0	0.286851	0.414962	1.33685	1.82013e-06	1.33118e-06	3.23586e-06
Liquorice Dutch type average	Sugar And Confectionery		1.95714	2.33037	2.81024	1.42841	0.000222418	6.04548	2.26148		6.22143	0.389421	0.987542	4.21568	9.99998	3.86656	2.31617
Spread chocolate hazelnut	Sugar And Confectionery		2.95714	0.000193371	0.0328535	1.16767	1.59561e-07	1.40286e-05	3.89012e-06		1.32857	4.61021e-06	4.67596e-06	0.701495	1.05952e-06	6.81183e-07	1.71108e-06
Spread duo w chocolate	Sugar And Confectionery		1.84286	7.98126e-06	1.53938e-06	0.000836688	1.51759e-07	9.01845e-06	2.76001e-06		2.16429	2.00743e-06	1.76276e-06	0.000527116	1.14747e-06	6.71436e-07	1.64571e-06
Sugar granulated	Sugar And Confectionery		13.3071	4.24357	6.5733	10.8587	7.96659e-07	0.340585	3.72541		19.2286	9.57543	10.4808	15.4641	11.1333	26.1389	17.7696
Syrup apple	Sugar And Confectionery		1.82143	26.494	20.8647	4.75397	35.2687	32.9279	18.5151		2.07857	5.93547	5.92131	6.28457	3.78559e-06	0.000155817	2.39441
Bean sprouts boiled	Vegetables		0	6.82207	1.28201	0.462022	23.4899	0.0147284	0.190881		0	1.63465	1.543	1.7177	1.51167e-05	3.52127e-06	1.23872e-05
Beans French boiled	Vegetables		8.64286	14.455	12.9677	12.091	3.0347	11.3703	10.9955		8.35714	15.2371	14.8648	13.2702	5.87582e-06	3.35416e-06	1.11785e-05
Beetroot boiled	Vegetables		0	3.98168	3.19521	3.08751	1.00577e-06	5.65227	6.90752		2.21429	8.10173	7.79114	6.30372	4.43304e-06	4.47288e-06	1.71904e-05
Broccoli boiled	Vegetables		7.42857	13.002	11.6223	10.7461	5.23627e-07	4.95954	7.12972		6.85714	13.072	12.7396	11.3126	1.83196e-06	1.47482e-06	4.33498e-06
Brussel sprouts boiled	Vegetables		0	6.91535	5.57369	5.44617	49.1959	20.5384	15.5036		0	11.2946	10.2515	7.62382	57.1428	34.7707	31.5217
Cabbage oxheart boiled	Vegetables		2.28571	6.22877	5.49528	5.08959	1.29862e-06	0.000376256	0.00562463		0	5.79141	5.47866	4.11896	5.13081e-06	2.55209e-06	6.28536e-06
Cabbage sauerkraut cooked	Vegetables		2.64286	5.6691	5.41346	5.37352	16.9888	1.01376	1.25644		4.42857	7.93344	7.62739	5.98328	4.77941e-05	4.86344e-06	1.11806e-05
Carrots boiled average	Vegetables		8.07143	11.4835	11.1464	11.2241	9.4741e-05	8.88457	15.4491		8.21429	14.3044	13.9844	12.5212	1.36291e-05	1.11523	15.4384
Carrots raw average	Vegetables		2.21429	5.59601	5.13537	5.23092	10.653	10.5195	14.6036		0	5.78367	5.48262	4.10356	9.08478	20.9457	25.509
Cauliflower boiled	Vegetables		11.4286	15.0097	14.1831	14.4661	8.71753e-07	7.3191	7.63882		10.9286	16.0044	15.7342	14.5447	2.64855e-06	1.97734e-06	5.67613e-06
Celeriac boiled	Vegetables		0	7.3173	6.39119	5.23242	6.60254	9.49645	7.86465		0	10.1866	9.50994	6.86581	1.04159e-05	4.3089e-06	1.32021e-05
Chicory boiled	Vegetables		0	1.68461	1.39855	1.37039	7.05034e-07	0.156088	1.28333		4.28571	7.08317	6.9369	6.37617	5.72847e-06	3.95829e-06	1.23407e-05
Courgettes boiled	Vegetables		3.42857	6.13193	5.27892	4.81548	2.01648e-07	1.76303e-05	8.2741e-06		2.35714	5.10849	4.92315	4.37299	1.07892e-06	7.04328e-07	1.77222e-06
Cucumber w skin raw	Vegetables		12.0714	14.8964	14.3024	12.6892	2.90593e-07	6.84895e-05	0.000248498		5.71429	6.92556	6.86895	6.64279	1.4514e-06	9.3137e-07	2.34469e-06
Endive boiled	Vegetables		0	3.41374	2.4291	2.09209	2.09625e-06	0.0015234	0.0530485		0	3.98243	3.77503	2.91766	6.01724e-06	3.39051e-06	7.65953e-06
Endive raw	Vegetables		0	5.05023	3.6901	2.10748	15.4046	11.822	8.9501		0	4.0817	3.821	2.83503	18.6218	9.47852	5.82964
Kale curly boiled	Vegetables		3.07143	9.91584	6.63875	5.87375	27.7208	0.0110867	0.783339		6.21429	11.5223	11.1761	10.073	0.861268	2.89672e-06	6.9379e-06
Leek boiled	Vegetables		2.85714	6.06527	5.64944	5.54467	2.41791e-06	1.66521	2.55008		4.78571	9.98902	9.71033	8.49435	5.04473e-06	2.89915e-06	7.77171e-06
Leek raw	Vegetables		0	4.4018	3.63634	3.52223	8.57143	8.43357	5.82667		0	6.67665	6.27379	4.71543	8.57124	0.000132364	0.000152592
Lettuce average raw	Vegetables		4	7.57704	6.5422	5.53248	9.23516	12.79	12.0581		4.6	7.55508	7.39918	6.74049	3.19201e-05	7.18309e-05	0.0993816
Mushrooms boiled	Vegetables		4.28571	11.4025	6.86197	5.49998	1.12119e-07	5.981e-06	2.22513e-06		4.92857	8.16947	7.69968	7.04185	5.71199e-07	3.29933e-07	8.16267e-07
Onions boiled	Vegetables		10.7857	13.3086	13.1511	13.1873	6.421	9.33777	10.3206		15.2143	19.9699	19.7267	18.7157	1.13819e-05	8.23958e-06	3.9953e-05
Onions raw	Vegetables		2.44286	5.13332	4.93928	4.84945	17.1428	9.732	8.33971		2.59286	7.37363	7.0871	6.07654	17.1428	11.949	7.54032
Peas and carrots tinned	Vegetables		2.71429	8.05123	7.12829	6.39867	2.3312e-07	1.79386e-05	7.1519e-06		5.42857	11.42	11.0887	9.37246	1.42497e-06	9.00278e-07	2.29663e-06
Peas frozen boiled	Vegetables		0	8.84931	7.22088	5.19966	1.70767	12.0137	9.50323		0	11.4416	10.8213	8.67948	0.000445271	14.288	18.8067
Rocket raw	Vegetables		0	9.8849	6.34078	2.81741	30	28.9735	18.9934		0	4.97369	4.71086	3.56805	30	27.1172	23.9
Spinach frozen boiled	Vegetables		4.57143	14.5473	11.7659	8.65717	8.15015e-07	0.481555	1.51575		2.64286	10.1919	9.74182	7.94386	2.06337e-06	1.15284e-06	2.91127e-06
Sweet pepper average boiled	Vegetables		0	3.36322	2.5092	2.22843	1.04015e-07	5.60534e-06	1.88426e-06		0	4.34303	4.0712	3.10504	5.61786e-07	3.64239e-07	9.10054e-07
Sweet pepper green boiled	Vegetables		0	3.70115	3.14368	2.45651	9.19976e-08	5.17773e-06	1.71003e-06		0	5.08037	4.80313	3.58816	5.40541e-07	3.44164e-07	8.45159e-07
Sweet pepper red boiled	Vegetables		0	3.48323	2.23427	2.05539	1.10977e-07	5.67629e-06	1.90376e-06		2.42857	6.2356	5.99647	5.18517	5.70196e-07	3.71593e-07	9.36151e-07
Sweet pepper red raw	Vegetables		0	3.51314	2.38702	2.16065	1.52853e-07	8.03142e-06	2.93097e-06		0	4.03365	3.82344	2.95041	6.96559e-07	4.90786e-07	1.28355e-06
Tomato average boiled	Vegetables		7.57143	9.99526	9.65505	9.03371	1.85798e-07	1.90751e-05	1.05794e-05		10.7857	13.5625	13.424	12.8491	1.05213e-06	7.31003e-07	1.89762e-06
Tomato average raw	Vegetables		14.9286	17.0457	16.8087	16.4663	4.01077e-07	1.7458	7.44651		7.57143	10.6748	10.518	9.87292	1.61102e-06	1.19702e-06	3.25264e-06
Tomato puree concentrated tinned	Vegetables		4.60714	14.2972	11.6856	8.2487	1.55456e-07	1.21975	10.9242		7.17857	13.3604	13.0766	11.7131	6.04157e-07	5.23219e-07	1.57635e-06

## Sheet: Table S2
Table S2. Nutrients and products fortified in the fortification scenarios: current diet with fortified meat, dairy, and fish alternatives (FORT-A); FORT-A, and with additionally fortified bread and oils (FORT-B)
Nutrient	Form	Products fortified	mg/100 g product
FORT-A scenario			(30% EU-NRV)a
Vitamin B2	Riboflavin 5'-phosphate sodium	Meat/fish/dairy alternatives	0.42
Vitamin B3	Niacinamide	Meat and fish alternatives	0.48
Vitamin B6	Pyridoxine HCl	Meat and fish alternatives	0.42
Vitamin B12	Vitamin B12	Meat/fish/dairy alternatives	0.00075
Vitamin D3	Cholecalciferol	Fish/dairy alternatives	0.0015
Iodine	Calcium iodate	Fish/dairy alternatives	0.045
Calcium	Calcium carbonate	Dairy alternatives	240
Iron	Ferric pyrophosphate	Meat alternatives	4.2
Selenium	Sodium selenite	Meat/fish/dairy alternatives	0.0165
Zinc	Zinc oxide	Meat/dairy alternatives	3
DHA+EPAb	Algae-derived	Fish alternatives	80
Filler	Maltodextrin	Meat/fish/dairy alternatives	250
FORT-B scenario – same as above, plus the following			(15% EU-NRV)a
Vitamin B2	Riboflavin 5'-phosphate sodium	Breads and oils	0.21
Vitamin B3	Niacinamide	Breads and oils	0.24
Vitamin B6	Pyridoxine HCl	Breads and oils	0.21
Vitamin B12	Vitamin B12	Breads and oils	0.000375
Vitamin D3	Cholecalciferol	Breads and oils	0.00075
Iodine	Calcium iodate	Breads and oils	0.0225
Calcium	Calcium carbonate	Breads and oils	120
Iron	Ferric pyrophosphate		2.1
Selenium	Sodium selenite	Breads and oils	0.00825
Zinc	Zinc oxide		1.5
DHA+EPA	Algae-derived	Breads and oils	40
a EU-NRV - European Union Nutrient Reference Value. Excludes overages for vitamins. b DHA - docosahexaenoic acid; EPA - eicosapentaenoic acid.

## Sheet: Table S3
Table S3. Daily energy and nutrient requirements or baseline intakes for Dutch adults aged 19-30 y
	Female		Male
	Lower limit	Upper limit	Lower limit	Upper limit
Energy (kcal)	1980	2220	2550	2850
Protein total (g)	52	131.25	61	168.75
Fat total (g)	46.7	93.3	60	120
SAFA (g)	-	23.3	-	30
PUFA (g)	-	28	-	36
Linoleic acid (g)	4.67	-	6	-
α-Linolenic acid (g)	2.33	-	3	-
DHA+EPA (mg)	200	1000	200	1000
Trans fatty acids (g)	-	2.3	-	3
Carbohydrates total (g)	210	367.5	270	472.5
Fibre (g)	28.5	-	35.6	-
Water (g)	2300	3800	2500	4000
Alcohol (g)	-	10	-	20
Retinol act. eq. (mcg)	680	3000	800	3000
Vitamin B1 (mg)	0.88	-	1.13	-
Vitamin B2 (mg)	1.6	-	1.6	-
Niacin eq (mg)	14.06	-	18.07	-
Vitamin B6 (mg)	1.5	25	1.5	25
Folate eq. (mcg)	300	1000	300	1000
Vitamin B12 (mcg)	2.8	-	2.8	-
Vitamin C (mg)	75	-	75	-
Vitamin D (mcg)	10	100	10	100
Vitamin E (mg)	11	300	13	300
Vitamin K total (mcg)	90	-	120	-
Calcium (mg)	950	2500	950	2500
Phosphorus (mg)	550	3000	550	3000
Iron (mg)	16	25	11	25
Sodium (mg)	-	2400	-	2400
Potassium (mg)	3500		3500
Magnesium (mg)	300	530	350	600
Zinc (mg)	7	25	9	25
Selenium (mcg)	70	300	70	300
Copper (mg)	0.9	5	0.9	5
Iodine (mcg)	150	600	150	600
Abbreviations: SAFA – saturated fatty acids; PUFA – polyunsaturated fatty acids; DHA – docosahexaenoic acid; EPA – eicosapentaenoic acid.

## Sheet: Table S4
Table S5. Percent of nutrient baseline value of selected nutrients among Dutch women and men aged 19-31 y for three fortification scenarios: current diet (CUR); CUR with fortified meat, dairy, and fish alternatives (FORT-A); FORT-A with fortified bread and oils (FORT-B), optimized for nutritional adequacy and 2030 greenhouse gas emission (GHGE) target
	WOMEN										MEN
	Baseline diet			Optimized for nutritional adequacy			Optimized for nutritional adequacy and 2030 GHGE target				Baseline diet			Optimized for nutritional adequacy			Optimized for nutritional adequacy and 2030 GHGE target
	CUR	FORT-A	FORT-B	CUR	FORT-A	FORT-B	CUR	FORT-A	FORT-B		CUR	FORT-A	FORT-B	CUR	FORT-A	FORT-B	CUR	FORT-A	FORT-B
	%NRV	%NRV	%NRV	%NRV	%NRV	%NRV	%NRV	%NRV	%NRV		%NRV	%NRV	%NRV	%NRV	%NRV	%NRV	%NRV	%NRV	%NRV
Vitamin B2 (mg)	0.793926	0.812488	1.02019	1	1.10853	1.24078	1	1.01503	1.10545		1.04566	1.0511	1.34115	1.05544	1.19518	1.45294	1	1.08676	1.23899
Niacin (mg)	1.14095	1.14129	1.16831	1.58758	1.44982	1.35458	1.3599	1.32228	1.32204		1.46235	1.46243	1.49178	1.57625	1.48957	1.47793	1.36846	1.3474	1.33497
Vitamin B6 (mg)	0.879922	0.899423	1.12097	1.20983	1.26934	1.42959	1	1	1.32088		1.16978	1.20065	1.51004	1.33796	1.3959	1.70548	1	1	1.4183
Vitamin B12 (μg)	1.45731	1.46544	1.6822	3.05498	2.58838	1.94403	2.247	1.97535	1.69437		1.87367	1.87258	2.17785	2.19445	2.0493	1.86025	2.09157	1.64239	1.10229
Vitamin D (μg)	0.246314	0.255421	0.582989	1	1	1	1	1	1		0.350037	0.352716	0.802008	1	1	1	1	1	1
Iodine (μg)	1.08877	1.10698	1.34435	1.32575	1.39874	1.73246	1.21648	1.40747	1.84057		1.39665	1.40201	1.73349	1.4933	1.57267	1.91655	1.51726	1.52611	2.18876
Calcium (mg)	1.07505	1.09038	1.29027	1.06782	1.1172	1.39588	1	1	1.12497		1.24234	1.24685	1.526	1.14303	1.23197	1.55152	1	1.06312	1.24124
Iron (mg)	0.552838	0.555651	0.767396	1	1	1.071	1	1	1.18026		1.01458	1.01622	1.44974	1.24288	1.27432	1.81444	1.29231	1.11295	1.79745
Selenium (μg)	0.600314	0.618329	0.787274	1.04957	1.14556	1.05197	1	1	1		0.81571	0.821266	1.05559	1	1	1.07757	1	1	1
Zinc (mg)	1.45569	1.48844	1.83526	1.6288	1.87493	2.17027	1.35238	1.57096	1.86567		1.47897	1.48683	1.86672	1.37396	1.48124	1.9613	1.1472	1.39623	1.73836
DHA+EPA (mg)	0.707029	0.707029	1.02352	5	5	2.96518	5	5	4.8677		0.595264	0.595264	1.03724	4.99607	4.10163	1.97216	5	4.61993	2.43576
Abbreviations: %NRV – Percentage of nutrient reference value; DHA – docosahexaenoic acid; EPA – eicosapentaenoic acid. Shortfalls of nutrients are highlighted in red.
